# Supplementary material for: Synthesis of thiodiazole copper microcapsules and release behavior of inhibiting R. solanacearum
Source: Royal Society of Chemistry journal article supplement (doi:10.1039/c3ra45744c), 2013-12-05
Supplement: c3ra45744c.pdf [file c3ra45744c.pdf]

Electronic Supplementary Material (ESI)

## **Synthesis of thiodiazole copper microcapsules and release behavior of inhibiting *R. solanacearum***

Chao Feng,\* Chengsheng Zhang, Fanyu Kong and Jing Wang

Key Laboratory of Tobacco Pest Monitoring & Integrated Management, State

Tobacco Monopoly Bureau; Tobacco Research Institute of Chinese Academy of

Agricultural Sciences, Qingdao 266101, PR China

E-mail: fengchao020511@163.com. Tel.: +86 532 88703236; Fax: +86 532 88701012

## S1 UV- visible absorption spectra

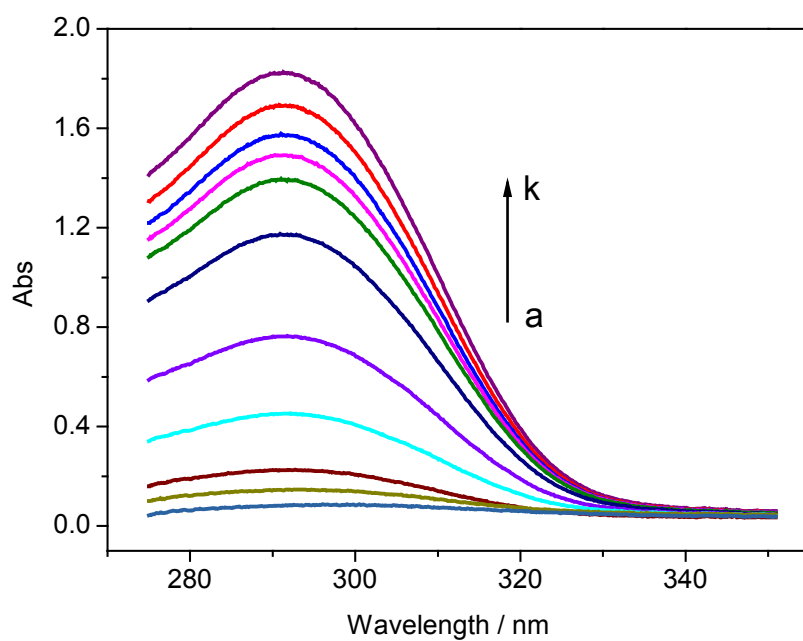

**Fig. S1 (A)** UV-visible absorption spectra of the released concentrations of AMT of different immersion time (pH=6 and 30°C): (a) 10 min, (b) 30 min, (c) 1.5 h, (d) 34 h, (e) 50 h, (f) 60 h, (g) 120 h, (h) 228 h, (i) 312 h, (j) 348 h, (k) 480 h.

## S2 Grade investigating method of tobacco disease

Grade investigating method of tobacco disease refers to Chinese National Standard<sup>1</sup>.

**Table S1** Grade classification of disease index

| Grade | Details                                                                                                                           |
|-------|-----------------------------------------------------------------------------------------------------------------------------------|
| 0     | disease-free                                                                                                                      |
| 1     | seldom existing green spots in stem; or 1/2 withered leaf in disease side                                                         |
| 3     | existing black spots in stem, but lower 1/2 stem height; or withered leaf ranged from 1/2 to 2/3 in disease side                  |
| 5     | existing black spots more than 1/2 stem height, however not reach the top of stem; or more than 2/3 withered leaf in disease side |
| 7     | black spots reach the top of stem; or all leaves withered                                                                         |
| 9     | the base of diseased plant died                                                                                                   |

$$\text{Disease index} = \frac{\sum (N_i \times G_i)}{N_t \times G_t} \times 100 \quad (\text{S1})$$

where,  $N_i$  is the number of diseased leaves of every grade;  $G_i$  is the corresponding grade of  $N_i$ ;  $i = 1, 2, 3, \dots, n$ ;  $N_t$  is the total number of leaves;  $G_t$  is the highest grade.

$$\text{Control effect (\%)} = \frac{C_d - T_d}{C_d} \times 100 \quad (\text{S2})$$

where,  $C_d$  is the disease index in the control area,  $T_d$  is the disease index in the treatment area.

### References

1. GB/T 23222-2008. Grade and investigation method of tobacco diseases and insect pests.
